# Supplementary figures and images for: The Effect of Mother Goat Presence during Rearing on Kids’ Response to Isolation and to an Arena Test
Source: MDPI journal article supplement (doi:10.3390/ani11020575), 2021-02-23

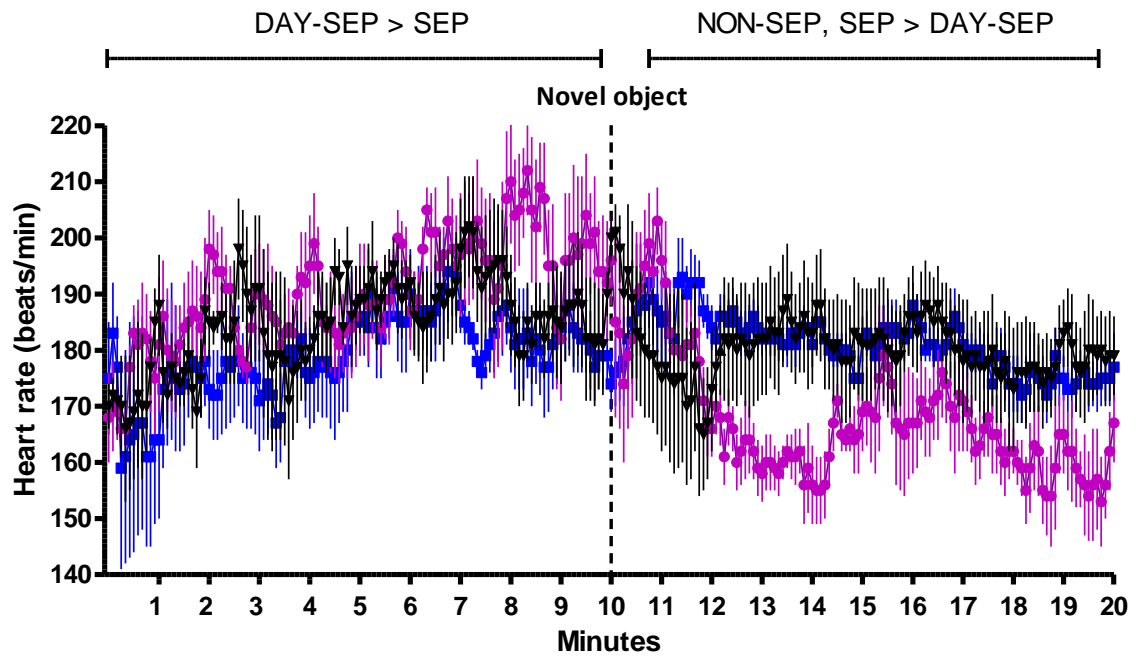

Supplement: s1 [file s1]

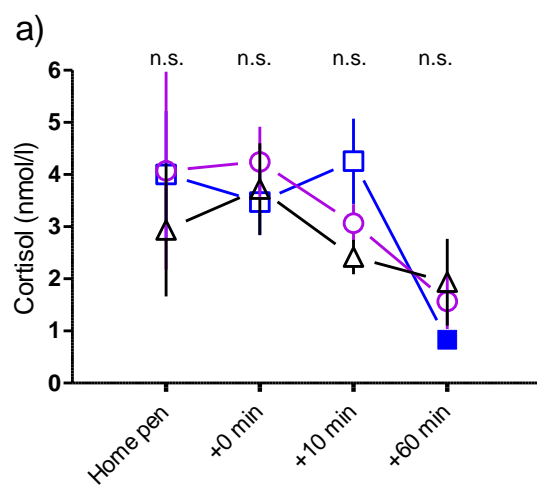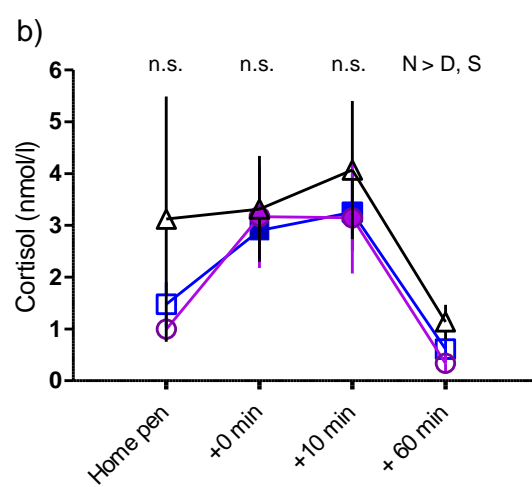

Supplement: s1 [file s1]

2 weeks

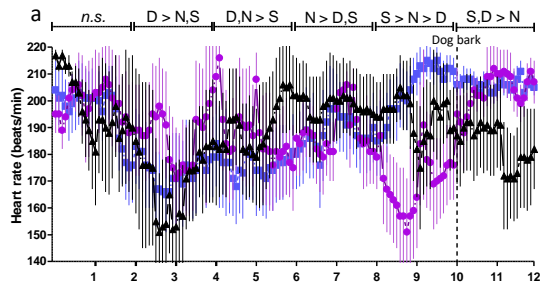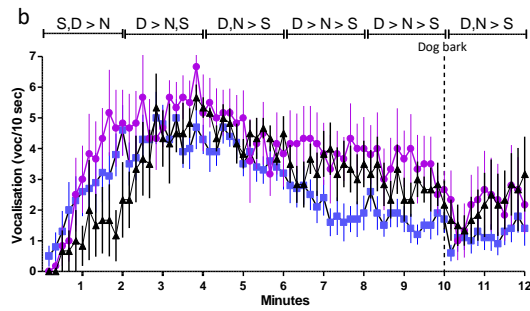

2 months

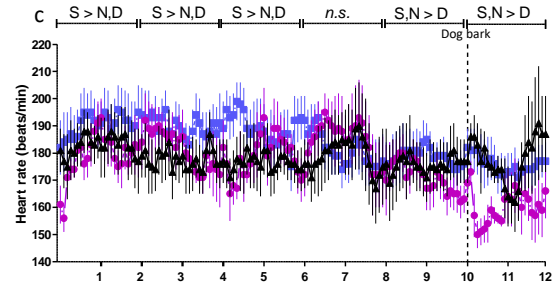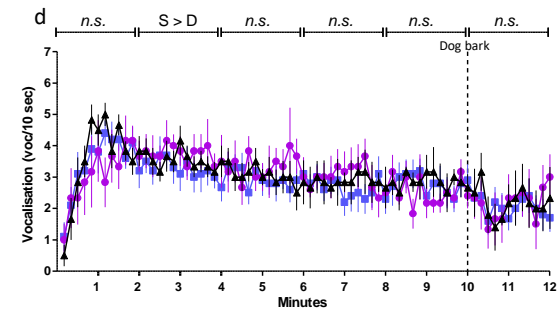

Supplement: s1 [file s1]
